1 Feed-forward and visual feed-back control of head roll orientation in  
2 wasps (*Polistes humilis*, Vespidae, Hymenoptera).

3

4 Stéphane Viollet<sup>(1)</sup> and Jochen Zeil<sup>(2)</sup>

5 <sup>(1)</sup> Aix-Marseille Université, CNRS, ISM UMR 7287, 13288, Marseille Cedex 09, France.

6 email: [stephane.viollet@univ-amu.fr](mailto:stephane.viollet@univ-amu.fr)

7

8 <sup>(2)</sup> ARC Centre of Excellence in Vision Science, Research School of Biology, The Australian  
9 National University, Biology Place, Bld. 46, Canberra, ACT 0200, Australia.

10 email: [jochen.zeil@anu.edu.au](mailto:jochen.zeil@anu.edu.au)

11

12

13 Address for correspondence: [stephane.viollet@univ-amu.fr](mailto:stephane.viollet@univ-amu.fr)

14 Keywords: *Polistes* wasps, Head roll control, Vision, Efference copy, feed-forward control,  
15 Modelling, Visuo-motor feedback loop, Gaze control.

16 Running title: Modelling visual head stabilization in wasps.

17 **Abstract**

18 Flying insects keep their visual system horizontally aligned suggesting that gaze stabilization  
19 is a crucial first step in flight control. Unlike flies, hymenopteran insects, such as bees and  
20 wasps do not have halteres that provide fast, feed-forward angular rate information to  
21 stabilize head orientation in the presence of body rotations. We tested whether  
22 hymenopteran insects use inertial (mechano-sensory) information to control head  
23 orientation from other sources, such as the wings, by applying periodic roll perturbations to  
24 male *Polistes humilis* wasps flying in tether under different visual conditions indoors and in  
25 natural outdoor conditions. We oscillated the insects' thorax with frequency modulated  
26 sinusoids (chirps) with frequencies increasing from 0.2Hz to 2Hz at a maximal amplitude of  
27 50° peak-to-peak and maximal angular velocity of  $\pm 245^\circ/\text{s}$ . We found that head roll  
28 stabilization is best outdoors, but completely absent in uniform visual conditions and in  
29 darkness. Step responses confirm that compensatory head roll movements are purely  
30 visually driven. Modelling step responses indicates that head roll stabilization is achieved by  
31 merging information on head angular velocity presumably provided by motion-sensitive  
32 with information on head orientation, presumably provided by light level integration across  
33 the compound eyes and/or ocelli (dorsal light response). Body roll in free flight reaches  
34 amplitudes of  $\pm 40^\circ$  and angular velocities greater than  $1000^\circ/\text{s}$ , while head orientation  
35 remains horizontal for most of the time to within  $\pm 10^\circ$ . In free flight, we did not find a delay  
36 between spontaneous body roll and compensatory head movements and suggest that this is  
37 evidence for the contribution of a feed-forward control to head stabilization.

38

39

## 40 Introduction

41 Hymenopteran insects, such as honeybees and solitary wasps stabilize their head around  
42 roll and pitch axes during flight (Zeil *et al.*, 2008; Boeddeker and Hemmi, 2009; Boeddeker *et*  
43 *al.*, 2010). Such compensatory head movements have been thoroughly studied in flies,  
44 where a significant contribution to head stabilization comes from non-visual, mechano-  
45 sensory input from modified wings, called halteres (Hengstenberg, 1993; Nalbach, 1993,  
46 1994, Nalbach and Hengstenberg, 1994, Dickinson, 1999; Sherman and Dickinson, 2003, Fox  
47 and Daniel, 2008; Huston and Krapp, 2009, Frye, 2009). Here we ask whether compensatory  
48 head movements in hymenopteran insects, which lack the fast, feed-forward, mechano-  
49 sensory input from Coriolis-force sensing modified wings, are driven in addition to visual  
50 (Boeddeker and Hemmi, 2009) also by mechano-sensory input that may be originating from  
51 mechanoreceptors on the wings, as suggested by Pix *et al.* (1993) or at the base of the  
52 antennae, as it has been demonstrated in moths (Sane *et al.*, 2007).

53 We used *Polistes* wasp males in this study, rather than honeybees, because (1) they readily  
54 fly when tethered and (2) continue doing so in the dark. We oscillated the tethered wasps  
55 around the roll axis in different visual conditions: within an opaque, horizontal cylinder in  
56 complete darkness, with an homogeneously illuminated, featureless white wall, with a  
57 horizontal pattern of regular black and white stripes, with an artificial horizon, in full view of  
58 a cluttered and well-lit indoor environment and of a natural visual environment outdoors.  
59 We found no evidence for mechano-sensory input to the system that stabilizes the head  
60 around the roll axis in these wasps. To explain visual control of head roll, we provide a  
61 control scheme for purely visually-mediated head stabilization based on two nested visual  
62 feedback loops involving the measurement of head angular rate and its orientation. We also  
63 analysed head roll control in free flight and suggest that its delay-less compensation for  
64 body roll is evidence for an efference copy of the body control input signal in spontaneous  
65 roll manoeuvres.

66

67

## 68 **Material and methods**

### 69 ***General procedure***

70 Male wasps (*Polistes humilis*) were captured at their nest, kept in foam-stopper vials and  
71 provided with sugar solution on cotton tips. Before preparing a wasp for an experiment we  
72 always checked whether the wasp could fly by releasing and recapturing it indoors. Wasps  
73 were held in a foam clamp and a small piece of cardboard was waxed to the thorax. The  
74 wasps were then fixed coaxially to the shaft of a servomotor via a flexible wire and a tiny  
75 clip that held the small piece of cardboard (Figure 1). The data we present are all from  
76 wasps that flew in this tethered state.

### 77 ***Experimental setup***

78 A servomotor (Faulhaber 0620C006, reduction gear ratio of 1024) was mounted on an  
79 optical bench so that its centre shaft faced a digital camera (PointGrey Firefly MV) (Figure  
80 1A). The motor and the camera were controlled via a data acquisition board (National  
81 Instrument USB 6128) and a Firewire bus. The shaft of the servomotor, the insect head and  
82 the optical axis of the camera were carefully aligned by means of two perpendicular  
83 translation stages mounted on the motor shaft, by adjusting the height and orientation of  
84 the camera above the optical bench and by adjusting the flexible wire that held the insect.  
85 We assured proper alignment by minimizing the translational movements of the head  
86 during rotations. The motor with the attached insect was then pushed inside an opaque  
87 cylinder (diameter 8.5 cm, length 10 cm) that was mounted on a fibre optics ring-light  
88 (Schott) connected to a cold light source (Schott KL 1500). The wasp was in addition  
89 illuminated by three pairs of infrared LEDs (OPE5685, wavelength 850nm), arranged  
90 coaxially around the camera lens to record head movements in darkness. A gentle air  
91 stream was generated by a small fan beside the camera pushing air past the camera lens  
92 towards the flying insect. The inside of the cylinder carried three different black and white  
93 patterns (Fig. 1B): equally spaced horizontal stripes of 1.25 cm width (spatial frequency of  
94 0.03 cycles/°), a 180° black, 180° white pattern forming an artificial horizon and a white  
95 piece of paper. Our patterns extended 200° in both azimuth and elevation at the head of the  
96 wasps and thus covered 56% of the panoramic visual field with  $\pm 40^\circ$  in the frontal and in the

97 caudal visual field remaining not stimulated by the patterns inside the cylinder. Experiments  
98 inside the cylinder were performed in a completely dark room. In addition, we recorded  
99 compensatory head movements without the cylinder so that wasps viewed the well-lit  
100 indoor environment of the laboratory and by taking the whole set-up outdoors, where the  
101 wasps were exposed to sunny midday light intensities in a natural scene including trees and  
102 the artificial structures of a courtyard, surrounded by large buildings. We measured light  
103 levels in these different conditions with an ILT 1700 radiometer (International Light  
104 Technologies) equipped with a Factor 1 Sensor W12826 to be: dark ( $0.04 \times 10^{-9}$  W/cm<sup>2</sup>);  
105 uniform ( $1.95 \times 10^{-3}$  W/cm<sup>2</sup>); horizon ( $2.38 \times 10^{-3}$  W/cm<sup>2</sup>); stripes:  $2.13 \times 10^{-3}$  W/cm<sup>2</sup>); room  
106 light ( $2.85 \times 10^{-4}$  W/cm<sup>2</sup>); outdoors ( $3.3 \times 10^{-2}$  W/cm<sup>2</sup>). Light was measured with a horizontally  
107 oriented cosine sensor placed at the position of the insect facing into the drum or outdoors  
108 at the location of the wasp head facing forwards.

### 109 ***Recording sessions***

110 We recorded head movements around the roll axis by placing a wasp about 10cm in front of  
111 the camera (Fig. 1C). We measured the performance of head roll compensation by applying  
112 a sine-wave oscillation with linearly increasing frequency from 0.2Hz to 2Hz, called a chirp  
113 signal with maximal amplitude of 50° peak-to-peak and a maximal angular velocity of  $\pm$   
114 245°/s (Fig. 1D). The amplitude of the oscillation decreased with increasing frequency (see  
115 Fig. 2) due to the dynamics of the brushless servomotor. We also employed a fast ramp  
116 signal with the same maximal angular velocity to check for the presence of position error  
117 signals monitoring the orientation of the head. Both chirp and ramp signals were applied to  
118 the servomotor that was rigidly coupled to the thorax of the wasp. Images were captured at  
119 50 frames/s for the chirp signal and at 120 frames/s for the ramp signal, with a resolution of  
120 640 x 480 pixels. The synchronization between servomotor and image acquisition was  
121 achieved with a custom-written Labview-based program (National Instruments Corp.)  
122 running on a PC. In darkness, the image acquisition was synchronized with flashes produced  
123 by the infrared ring-light. Video sequences were stored frame by frame as uncompressed 8-  
124 bit tiff images for off-line processing.

125

126 **Data analysis**

127 The head orientation ( $\theta_{\text{head}}$ ) and body orientation ( $\theta_{\text{body}}$ ) of wasps were manually digitized  
 128 with a custom-written Matlab-based (Mathworks, Nattick, USA) program (Jan Hemmi and  
 129 Robert Parker, The Australian National University) by recording frame-by-frame the x/y  
 130 positions of two markers at the lateral-most part of the head and two markers on the piece  
 131 of cardboard that was attached to the thorax of the wasp (see Fig. 1C). By definition, we  
 132 have the following relationship between  $\theta_{\text{head}}$  and  $\theta_{\text{body}}$ :

$$133 \quad \theta_{\text{body}} + \theta_{\text{headbody}} = \theta_{\text{head}} \quad (1)$$

134 with  $\theta_{\text{headbody}}$  being the angular position of the head with respect to the body.

135 For perfect compensation of a rotational movement of the body (in our case around the roll  
 136 axis), the angular orientation  $\theta_{\text{headbody}}$  must be equal and opposite to  $\theta_{\text{body}}$ . For the ideal case  
 137 of  $\theta_{\text{head}} = 0$ , equation (1), becomes  $\theta_{\text{headbody}}(t) = -\theta_{\text{body}}(t)$ . This means that the transfer  
 138 function  $H(s)$  between  $\theta_{\text{body}}$  and  $\theta_{\text{headbody}}$  must be equal to -1 in the case of perfect  
 139 compensation. To summarize, we have:

$$140 \quad H(s) = \frac{\theta_{\text{headbody}}(s)}{\theta_{\text{body}}(s)} = -1 \quad (2)$$

141 with  $s$  being the Laplace variable.

142 By definition, equation (2) means that in the case of perfect compensation, the module of  
 143  $H(s)$ , denoted  $|H(j\omega)| = 1$  (i.e., 0dB) and the phase denoted  $\text{Arg}(H(j\omega)) = -180^\circ$ , with  $\omega$  the  
 144 frequency in  $\text{rad s}^{-1}$ .

145 To determine the Bode diagram, we estimated the gain ( $|H(j\omega)|$ ) and phase ( $\text{Arg}(H(j\omega))$ ) of the  
 146 transfer function  $H(s)$  as follows:

$$147 \quad H(s) = \frac{\theta_{\text{headbody}}}{\theta_{\text{body}}} \quad (3)$$

148 Therefore, from (3) the gain and phase of  $H(s)$  were computed as follows:

$$149 \quad |H(j\omega)|_{dB} = \frac{|\theta_{head} - \theta_{body}|}{|\theta_{body}|} = \frac{|\theta_{headbody}|}{|\theta_{body}|} \text{ and } Arg(H(j\omega)) = Arg\left(\frac{\theta_{headbody}}{\theta_{body}}\right)$$

150 The frequency response of  $H(s)$  was then estimated by applying spectral analysis on the time  
 151 series of  $\theta_{body}$ ,  $\theta_{headbody}$  and  $\theta_{head}$  (using the Matlab System Identification Toolbox 'spa'  
 152 function, see Ljung, 1999 for further details). As discussed by Xia (1997), the use of a chirp  
 153 signal combined with a spectral analysis method allows one to use an efficient noise  
 154 reduction technique based on the Fourier transform for the estimation of the transfer  
 155 function of a linear system. Due to its better noise immunity, we therefore preferred  
 156 spectral analysis over the classical method based on the Fourier transform (see Schwyn *et*  
 157 *al.*, 2011). The transfer function of a dynamical system can be directly estimated from the  
 158 ratio of the Fourier transform of the output signal (here  $\theta_{headbody}$ ) to the Fourier transform of  
 159 the input signal (here  $\theta_{body}$ ). For most of the time, irregularities and noise make this method  
 160 (which has been called frequency analysis) difficult to use for the determination of the  
 161 phase directly (see Ljung, 1996). We, therefore, preferred to use spectral analysis because it  
 162 is less sensitive to noise. Spectral analysis allows one to estimate directly the transfer  
 163 function from input and output signals by estimating the cross-spectrum between two  
 164 signals (here  $\theta_{body}$  and  $\theta_{headbody}$ ) and the auto-spectrum of the input signal (here  $\theta_{body}$ ) (see  
 165 Ljung, 1996, 1999). The cross-spectrum is defined by the Fourier transform of the cross-  
 166 covariance function, whereas the auto-spectrum is the Fourier transform of the cross-  
 167 spectrum with itself. The quality of the estimation depends on the Fourier transform  
 168 method. A classical windowing method based on the Hamming window is the most common  
 169 window used in spectral analysis. The choice of the window size is a pure trade-off between  
 170 frequency resolution and the variance of the estimation.

171 The mean gain error is the mean of the error between the mean value of the gain  $|H(j\omega)|$  of  
 172 each wasp and 0dB as follows:

$$173 \quad \text{Mean\_Error}_{\text{gain}} = \text{mean}(0_{dB} - \text{mean}(|H(j\omega)|))$$

174 The mean phase error is the mean of the error between the mean value of the phase  
 175  $Arg(H(j\omega))$  of each wasp and  $-180^\circ$  as follows:

176  $\text{Mean\_Error}_{\text{phase}} = \text{mean}(180^\circ - \text{mean}(\text{Arg}(H(j\omega))))$

177 When there was no compensation of the head orientation induced by roll movements of the  
178 thorax, it was not possible to compute the Bode diagram. In such cases we computed the  
179 cross-correlation between  $\theta_{\text{headbody}}$  and  $\theta_{\text{body}}$  and the autocorrelation function of  $\theta_{\text{body}}$ .

### 180 **Free flight recordings**

181 Male *Polistes* wasps were filmed from behind with a horizontally levelled Casio Exilim EX-F1  
182 camera at 300fps as they were regularly patrolling while often facing the branches of a  
183 *Magnolia* tree in Canberra, Australia in the autumn of 2012 (see Supplementary Material  
184 Movies). The camera was about 2 m away from the scene and viewed a recording area of  
185 23.7x17.8 cm (6.8x5.1°) at an image size of 512x384 pixels. Perspective distortions were  
186 thus minimal. However, there are two remaining sources of errors in determining head and  
187 body roll orientations. One are errors in determining x/y coordinates from films (see below)  
188 and the other are errors introduced by the fact that although the wasps' flight paths were  
189 clearly perpendicular to the camera viewing direction, the orientation of the wasps'  
190 longitudinal body axis was not always parallel to the optical axis of the camera. This  
191 introduces errors into the determination of body roll orientation, because it confuses body  
192 yaw movements with roll movements. In order to identify the parts of sequences in which  
193 the camera viewed animals from straight behind, we estimated their yaw orientation by the  
194 horizontal distance between the head and the tip of the abdomen (Fig. 1E), after having  
195 determined the average length of the longitudinal body axis of wasps to be  $1.48 \pm 0.08$  cm  
196 ( $n = 16$ ) from instances where wasps were clearly seen side-on (see Fig. S1). For the  
197 correlation analysis shown in Fig. 7, we only used those parts of sequences, in which the  
198 yaw orientation of wasps was to within  $\pm 10^\circ$  of the direction parallel to the camera optical  
199 axis (marked by grey horizontal bars in Fig. 7A). Note that this is a conservative criterion,  
200 because it also discards instances when the insects maintain large pitch angles during roll  
201 manoeuvres, which rotates the tip of the abdomen away from the midline.

202 For the results shown in Fig. 7B and C, we analysed 14 flight episodes, ranging from 0.34 s to  
203 1 s in length (8.14 s of total flight time), from which we extracted 13 sequences that fulfilled  
204 this criterion (3.75 s of total flight time), ranging from 0.17 s to 0.43 s in length.



205 Sequences were stored as .mov-h264 encoded videos and sections showing flying wasps  
206 were exported as .jpeg sequences using QuickTimePro (Apple Inc.). The x/y coordinates of  
207 the dorsal apex of antennae, the dorsal edge of the head and of the ventral-most point half  
208 way between the long dangling hind legs (blue and red dots in Fig. 1E) were extracted frame  
209 by frame using a Matlab-based program (Matlab, Nattick, USA), written by Jan Hemmi and  
210 Robert Parker (The Australian National University). Head orientation relative to the  
211 horizontal and body orientation relative to the vertical (for easier comparison later rotated  
212 by 90°) were determined from the x/y coordinates using custom-written Matlab programs.  
213 We estimated digitization errors by determining x/y coordinates for one sequence five times  
214 (Fig. 7A) and calculating the mean and standard deviations for head and body orientation.  
215 The mean standard deviation was in all cases below 2° (see Fig. 7A). The Matlab xcorr  
216 function was used to calculate cross-correlations.

217

## 218 Results

219 We present our chirp data set in Fig. 2 for the four conditions that provided visual input  
220 (outdoors, indoors, striped pattern and horizon). Fig. 2 shows over time for each visual  
221 condition (see Fig. 1B) the mean value (thick lines) and standard deviation (coloured  
222 envelopes) of body orientation ( $\theta_{\text{body}}$ , blue), head orientation ( $\theta_{\text{head}}$ , red) and the orientation  
223 of the head with respect to the body ( $\theta_{\text{headbody}}$ , black mean, green std) for at least two wasps  
224 (see Fig. S2 for all individual responses).

225 We note that head movements never compensate for more than about 50% of the imposed  
226 body roll movements at the relatively large oscillation amplitude we used, as is also the case  
227 in *Calliphora* (Hengstenberg, 1988). This was true for all conditions, in which pattern  
228 contrast was available (outdoors, indoors, stripe pattern and horizon). Perfect head roll  
229 compensation would mean that the wasp's head orientation remains constant (i.e.,  $\theta_{\text{head}} =$   
230  $0^\circ$ ) and  $\theta_{\text{headbody}}$  and  $\theta_{\text{body}}$  would change in anti-phase. Compensatory head movement  
231 amplitudes were always smaller than the amplitude of the imposed oscillation. In the  
232 frequency domain (Fig. 3), this under-compensation is reflected in a negative gain that was  
233 always smaller than 0dB (gain < 1) over the frequency range we tested (0.2Hz to 2Hz).

234 Perfect compensation would mean that the gain between  $\theta_{\text{headbody}}$  and  $\theta_{\text{body}}$  is equal to 1  
235 (0dB) and the phase is equal to  $-180^\circ$  in the Bode plots (as indicated by a black dotted line in  
236 Fig. 3B and C). Table 1 shows the mean error between the real head roll compensation of  
237 wasps and the perfect case for each experimental condition.

238 The responses obtained in natural outdoor illumination conditions (Fig. 2 and 3) exhibit  
239 smaller gain and phase errors than those obtained for stripe and horizon patterns.  
240 Compensation is best in outdoor conditions with a mean gain error of 2dB and a phase error  
241 of  $9^\circ$  (N=3, n=5; Table 1). Outdoors, the gain remains nearly constant over the frequency  
242 range (blue line in Fig. 3B), but the mean phase value improves in the frequency range from  
243 1Hz to 2Hz, as the frequency of the oscillation increases and the amplitude decreases. We  
244 obtained similar results for the gain, but not the phase in the room light condition (red lines  
245 in Fig. 3B and C).

246 The compensatory responses are similar in the striped pattern (green lines in Fig. 3B and C)  
247 and horizon conditions (black lines), although gain errors are on average larger than in the  
248 outdoor and indoor conditions (Table 1). In all the cases, the maximum mean phase is about  
249  $-195^\circ$  corresponding to a mean phase error of  $15^\circ$  (see figure 3C and table 1) which means  
250 that the compensatory response has a mean time lag shorter or equal to two sampling  
251 periods (40ms, see Fig. 4B). As far as average gain error is concerned, head compensation  
252 amplitude is smallest with the artificial horizon, which was the poorest visual stimulus in  
253 terms of spatial frequency composition.

254 To document intra-individual variability, Bode diagrams for three stimulus repetitions  
255 outdoors are shown for one wasp in Fig. 3D and E, together with means and standard  
256 deviation for an additional individual in the lower panel of Table 1.

257 When no pattern contrast was available in the uniform bright condition and in complete  
258 darkness, there was no evidence of any head roll compensation (Fig. 4A). The weak  
259 modulation of head orientation in the uniform condition was most likely caused by some  
260 remaining visual structure within the apparatus and the small head movements in the dark  
261 condition were in the wrong direction. Head movement amplitudes were too small for the  
262 computation of the Bode diagrams. We therefore computed the autocorrelation function of

263 body orientation  $\theta_{\text{body}}$  and the cross-correlation function between  $\theta_{\text{body}}$  and  $-\theta_{\text{headbody}}$  (Fig.  
264 4B). Compared to the four conditions that provided visual input, with maximal correlation  
265 coefficients between 0.7 and 0.9 and lags between 40 ms and 80 ms, the coefficients do not  
266 reach 0.4 in the uniform and -0.4 in the dark condition (Fig. 4B). We conclude that there are  
267 no detectable head movements that correlate with the sinusoidal oscillation of the wasps'  
268 body.

269 The responses to imposed step changes in body orientation (Fig. 5) confirm that  
270 compensatory head movements are purely visually driven, but also provide two additional  
271 pieces of information. Outdoors, the wasps appear to have an absolute reference for head  
272 orientation because they were able to maintain a constant compensation angle of up to  $20^\circ$   
273 when the body is turned  $45^\circ$  to the left or to the right (Fig. 5, left column). This cannot be  
274 due to a velocity servo, such as the optomotor response of the fly that stabilizes head yaw  
275 orientation by minimizing rotational optic flow around the yaw axis. Indeed, in a situation  
276 that does not provide angular position information, such as the regular black and white  
277 stripe pattern, wasps tend to be unable to keep head orientation constant after a step  
278 rotation (centre column, Fig. 5), indicating that the initial response of a velocity servo  
279 becomes corrected by a signal that adjusts head position relative to the thorax (Preuss and  
280 Hengstenberg, 1992, Gilbert and Bauer, 1998, Paulk and Gilbert, 2006). In full darkness  
281 (right column, Fig. 5), the wasp's head orientation in some cases tends to overshoot the  
282 imposed rotation of the body and in some cases not. It is not clear at present, why this  
283 should be so, but this observation again demonstrates that head orientation is not  
284 controlled by haltere-like mechano-sensory input that would help to compensate for body  
285 rotations.

286 We attempted to model step responses of the head roll stabilization system in *Polistes*  
287 wasps by considering the angular orientation of the body as an input disturbance for two  
288 nested visual feedback loops: an outer speed feedback loop based on the measurement of  
289 head orientation (transfer function  $H_{\text{Eye}}(s)$ ) and an inner position feedback loop based on  
290 the measurement of the head rotational speed provided by wide-field motion sensitive  
291 neurons (transfer function  $H_{\text{MS}}(s)$ ) with responses that could be similar to those of the VS  
292 neurons of the blowfly (Krapp et al. 1998). Fig. 6A shows on the left a block diagram of this

293 model and on the right the different parameters of the transfer functions used to compute  
294 the model responses.

295 Model responses to 45° step changes of body orientation for  $\theta_{\text{head}}(t)$  (grey lines in Fig. 6B)  
296 and for  $\theta_{\text{headbody}}(t)$  (red lines, Fig. 6B) are very similar to the step responses we measured  
297 outdoors and in the presence of periodic stripes, with the exception of slight differences in  
298 steady-state values. Best fits for individual wasp responses required small adjustments in  
299 the values of the gain and the time constant of the transfer functions. The  $H_{MS}(s)$  cut-off  
300 frequency indicates that outdoors, wasps should be able to respond to temporal  
301 frequencies of about 8 Hz, compared to 4Hz in the indoor stripe environment.

302 In free flight, male *Polistes* wasps hold their heads horizontal to within  $\pm 10^\circ$  despite body  
303 roll movements of more than  $\pm 40^\circ$ . The four panels of Fig. 7A show the time course of head  
304 roll orientation ( $\theta_{\text{head}}$  in red), of body roll orientation ( $\theta_{\text{body}}$  in blue), of the inverse of head  
305 orientation relative to the body ( $-\theta_{\text{headbody}}$  in black) and of the yaw orientation of the  
306 longitudinal body axis (in green). The sequence in the top panel of Fig. 7A was digitized 5  
307 times to gain estimates of how accurately head and body orientation can be determined,  
308 with thick lines and equivalently shaded areas showing means and plus/minus standard  
309 deviation, respectively. Numbers on the right are the mean standard deviations for the four  
310 variables. The grey horizontal bars in all panels of Fig. 7A mark the range of  $\pm 10^\circ$ .

311 The distributions of head and body roll orientation during 3.75 s of flight (13 sequences,  
312 extracted from 14 flight episodes) during which wasps faced away from the camera to  
313 within  $\pm 10^\circ$  confirm that the wasps keep their head aligned horizontally to within  $\pm 10^\circ$  in the  
314 presence of body roll movements of up to  $40^\circ$  (Fig. 7B). Body roll oscillations in free flight  
315 thus do reach comparable amplitudes to the ones used in our experiments and the quality  
316 of head roll stabilization is as good as that reported for honeybees (Boeddeker and Hemmi,  
317 2009). Naturally occurring angular velocities of the body tend to be predominantly below  
318  $500^\circ/\text{s}$  (Fig. 7B), so that the  $245^\circ/\text{s}$  we used in our experiments were well within the natural  
319 range of velocities. Most surprisingly, in a cross-correlation analysis applied to 13 flight  
320 sequences, ranging from 0.17 s to 0.43 s in length, we did not find detectable delays  
321 between body roll and head orientation (Fig. 7C, left panel), nor between the angular rates  
322 of body and head roll movements (Fig. 7C, right panel). Since our sampling interval was 3.33

323 ms at 300 fps, it seems unlikely that head stabilization is achieved by visual feedback, unless  
 324 it is unusually fast in wasps. However, even the fast feed-forward signals from wing-based  
 325 mechanoreceptors in flies require 3-5 ms to generate a head movement (Sandeman and  
 326 Markl, 1980; Hengstenberg, 1993).

327 We did not find evidence for haltere-like mechanosensory input to the head stabilization  
 328 system in response to imposed body roll rotations. The absence of a detectable and realistic  
 329 delay in free flight thus suggests that the head may be stabilized by an efference copy signal.  
 330 We modelled such a feed-forward control of the head orientation (Fig. 7D) as an extension  
 331 of the two nested visual feedback-loops (Fig. 6A) by considering a common drive signal  $U_{roll}$   
 332 that elicits a spontaneous roll manoeuvre and controls both head and body orientation  
 333 around the roll axis. A feed-forward controller  $C_f(s)$  makes the head ( $\theta_{headbody}$ ) compensate  
 334 exactly for any rotation of the body ( $\theta_{body}$ ).

335 According to the complete block diagram of the proposed head stabilization system (Fig.  
 336 7D), assuming that there is no disturbance applied to the body, the orientation of the head  
 337 can be expressed as:

$$338 \quad \theta_{head} = G_{body}(s)U_{roll} - G_{head}(s)C_f(s)U_{roll} \quad (4)$$

339 For perfect compensation of a rotational movement of the body (in our case around the roll  
 340 axis), the angular orientation  $\theta_{headbody}$  must be equal and opposite to  $\theta_{body}$ , which means that  
 341  $\theta_{head} = 0$ . Then from (4),  $C_f(s)$  can be written as:

$$342 \quad C_f(s) = \frac{\hat{G}_{body}(s)}{\hat{G}_{head}(s)} \quad (5)$$

343 with  $\hat{G}_{body}(s)$  and  $\hat{G}_{head}(s)$  the estimated transfer functions of  $G_{body}(s)$  and  $G_{head}(s)$ ,  
 344 respectively. The thick grey and red lines in the three lower panels of Fig. 7A show the  
 345 output of this model using the following transfer functions:

$$346 \quad C_f(s) = \frac{0.65}{(1+2.10^{-3}s)} \quad \text{and} \quad G_{head}(s) = \frac{1}{(1+1.10^{-3}s)},$$

347 while the other transfer functions remained the same as those used for wasp 1 outdoors  
 348 (see Fig. 6A). Then from (5),  $\hat{G}_{body}(s)$  and  $\hat{G}_{head}(s)$  can be written as:

349  $\hat{G}_{body}(s) = \frac{1}{(1+2.10^{-3}s)}$  and  $\hat{G}_{head}(s) = \frac{1}{0.65}$ .

350 In conclusion, the model results are in such close agreement with the free flight behaviour  
351 that we suggest a feed-forward control signal to be responsible for the fast compensatory  
352 head-roll movements in free flight.

353

## 354 **Discussion**

355 We have investigated compensatory head-roll in *Polistes* wasps in tethered flight and found,  
356 at least in the frequency range we tested, no evidence for an haltere-like mechano-sensory  
357 input that would help to compensate for imposed body roll movements. The extent of the  
358 visually driven compensation depends on the light intensity, possibly contrast and on the  
359 structure of the visual scene: compensation is best outdoors and becomes weaker under  
360 artificial light and visual conditions, such as in a laboratory scene, a 180° black and white  
361 pattern or a regular pattern of black and white stripes. Outdoors, wasps are able to maintain  
362 a constant, more or less horizontal head orientation after an imposed step rotation,  
363 indicating that an outdoor scene provides absolute orientation reference information, such  
364 as the overall light distribution or the sun. Wasps are unable to compensate for imposed  
365 body roll in uniform bright light and in total darkness. In free flight, wasps keep their head  
366 horizontal to within  $\pm 10^\circ$  despite body roll amplitudes of  $\pm 40^\circ$  and angular velocities up to at  
367 least 1000°/s.

368 Admittedly our samples are relatively small and the results of studying control systems in  
369 tethered flight need to be interpreted with caution: the tether interferes with the flexible  
370 properties of the thorax and in many other respects does not represent free flight  
371 conditions. However, within these limits, our results are consistent across animals and  
372 stimulus regimes and our free flight analysis suggests that rotation speed and amplitudes  
373 were comparable to those occurring most frequently in natural flight. Our data also  
374 demonstrate that there are significant differences in how control systems work even in  
375 tethered flight, depending on whether they are presented with artificial compared to  
376 naturalistic input.

377 There are a number of reasons why compensatory reflexes in response to imposed body  
378 rotations can be expected to perform more reliably under natural conditions. Both  
379 photoreceptors (Laughlin and Weckström, 1993; Tatler *et al.*, 2000; Juusola and Hardie,  
380 2001a,b) and motion sensitive interneurons (e.g. Egelhaaf *et al.* 2001; Lewen *et al.* 2001)  
381 become faster and more reliable as temperature and/or light levels increase. For instance,  
382 the response latency and the response reliability of the motion sensitive H1 neuron in  
383 blowflies increases significantly with a 8°C increase in temperature (Egelhaaf *et al.*, 2001),  
384 the response speed and temporal resolving power of fly photoreceptors more than double  
385 across the temperature range from 19°C to 34°C (Tatler *et al.*, 2000) and the information  
386 capacity of fly photoreceptors and ocellar interneurons increases with both light intensity  
387 and temperature (Juusola and Hardie, 2001a,b; Simmons, 2011). However, there are many  
388 other significant differences between our artificial visual environments and the natural one,  
389 such as the distribution of light across the terrestrial and celestial hemispheres, including its  
390 spectral composition, its state of polarization and its spatial frequency spectrum. For all  
391 these reasons we probably obtained weaker responses under indoor illumination conditions  
392 and when wasps were surrounded by a structured environment composed of regular black  
393 and white stripe pattern.

394 These differences are most likely related to the different visual input channels that are  
395 known to be involved in the stabilization of the head around the roll axis in insects (for  
396 reviews see Hengstenberg, 1993; Taylor and Krapp, 2007). Wasps, like flies and dragonflies,  
397 possess ocelli that function as fast horizon sensors (Stange, 1981; Berry *et al.*, 2006, 2007),  
398 but are also involved, together with the compound eyes in the dorsal light reflex (e.g.  
399 Schuppe and Hengstenberg, 1993; Hengstenberg, 1993; Parsons *et al.*, 2010). Our successful  
400 modelling of step responses required in addition to a velocity servo that minimizes residual  
401 image motion across the eye, a position servo that adjusts the absolute orientation of the  
402 head. The input to this position servo could either be the overall light distribution such as in  
403 the tonic dorsal light response mediated by the compound eyes (cf. Hengstenberg, 1993) or  
404 the position of visual features across the visual field that would be most salient in the  
405 outdoor condition. It is not clear at this stage, whether the ocelli in wasps could also provide  
406 positional information, as they do in dragonflies (Stange, 1981). In our model, we did not  
407 consider a phasic component of the dorsal light response, such as it is elicited by the ocelli in

408 *Calliphora* (Schuppe and Hengstenberg, 1993; Hengstenberg, 1993). However, for the head  
409 roll stabilization, the fast high-pass filtering function of the ocelli could clearly complement  
410 the slower low-pass filter of the compound eyes.

411 Under all experimental conditions, we found the gain of the head roll compensation to be  
412 smaller than 1, while in free flight, the wasps were perfectly able to keep their head  
413 horizontal at very similar thorax roll amplitudes and angular velocities. We see this as a  
414 reminder of two crucial problems with tethered flight experiments: (1) tethered flight  
415 interferes severely with the complicated mechanical properties of the thorax flight motor  
416 system, including the prosternal organs that may be involved in a mechano-receptive  
417 feedback on head position relative to the thorax and (2) it neglects the normal, active state  
418 of flight because it prevents feed-forward signals from playing their potentially crucial role  
419 in controlling head orientation during spontaneous flight manoeuvres.

420 In flies, the angular position of the head relative to the body is controlled in closed-loop by  
421 means of the prosternal organs (Preuss and Hengstenberg, 1992; Gilbert and Bauer, 1998;  
422 Paulk and Gilbert, 2006). For instance, it takes less than 300ms for a flesh fly to compensate  
423 for an angular perturbation of 35° applied to the head (Gilbert and Bauer, 1998) and only  
424 30ms for a black soldier fly to pitch its head by 30° (Paulk and Gilbert, 2006). We are not  
425 aware that the mechanical and the mechano-sensory coupling between head and thorax  
426 have been investigated in *Polistes* wasps. There do not appear to be specific structures such  
427 as the prosternal organ, but extensive hair fields across the posterior cuticle of the head  
428 that may be in contact with the anterior parts of the thorax (personal observation). We are  
429 thus not in the position to explain our observation that during the step response in the dark  
430 the head appears initially to be rigidly locked to the thorax and then overshoots in the  
431 direction of rotation. If head rotation would be solely governed by inertia in this situation  
432 the head would first stay behind and then be pulled in the direction of rotation by some  
433 spring or arresting properties of the neck connective. Schilstra and van Hateren (1999a,b)  
434 assumed that in the fly *Calliphora* the thorax weighs about 100mg and the head about  
435 10mg. That ratio appears to be only 2 in wasps, because in our model given in figure 7, we  
436 obtained a good fit of behavioural performance with body dynamics ( $G_b(s)$ ) 2 times larger  
437 than those of the head. It is clearly of interest to determine body dynamics in



438 hymenopteran insects in more detail in future studies.

439 Unlike blowflies, which execute fast body roll rotations of up to  $2000^{\circ}/s$  (Schilstra and van  
440 Hateren, 1999a), with a maximum amplitude of  $\pm 90^{\circ}$  (Hengstenberg, 1988), *Polistes* wasps –  
441 as our free flight analysis shows – are sluggish fliers, with long dangling legs extended during  
442 flight that lead to slower thorax roll dynamics and therefore requiring head roll  
443 compensation of much smaller and slower body rotations (see Fig. 7). Head stabilization  
444 outdoors and indoors does become more accurate with increasing frequency up to 2Hz in  
445 *Polistes* wasps (see Bode diagrams in Fig. 3B) and in free flight, both wasps and honeybees  
446 (Boeddeker and Hemmi, 2010) are able to stabilize their head roll orientation to within  $\pm 10^{\circ}$   
447 of the horizontal despite body roll oscillations as large as  $\pm 45^{\circ}$ . Boeddeker and Hemmi  
448 (2010) found this to be true in flying honeybees up to maximum roll velocities of  $300^{\circ}/s$ ,  
449 which is slightly lower compared to the velocities experienced in natural flight by *Polistes*  
450 males (Fig. 7C). We did not detect a noticeable time lag between body roll movements and  
451 compensatory head movements in wasps, confirming what Boeddeker and Hemmi (2010)  
452 found in freely flying honeybees responding to a rotating pattern. Although such zero-delay  
453 responses could theoretically be due to non-linearities and temporal filter properties in the  
454 visual pathway, we propose here a vision-based feed-back control scheme enhanced by a  
455 feed-forward control of the head orientation (see figure 7). When compensation is effective  
456 (see figures 5 and 6), the presence of overshoot in step responses can be explained in our  
457 model by a high gain of the visual controller  $C_v(s)$ .

458 We note that the time delay we measured in the chirp response analysis can result from a  
459 combination of a pure delay that shifts a signal by a fixed amount along the time axis,  
460 regardless of its frequency and of phase shifts caused by temporal filters in the signal  
461 processing pathways. However, as we did not notice any pure time delay in the step  
462 responses, the transfer functions of model responses to  $45^{\circ}$  step changes (figure 6) do not  
463 include any terms accounting for time delays.

464 The issue of zero-lag responses during spontaneous movements in free flight needs to be  
465 addressed in future experiments, possibly using suspended insects that can rotate freely, so  
466 that the time lag between compensatory head movements and rotating visual patterns can

467 be accurately determined. This would also make it possible to identify the cut-off frequency  
468 of the visual feedback loops. .

469 *Polistes* wasps, like all hymenopteran insects, do not possess modified wings such as the  
470 halteres of Diptera and Strepsiptera and wing mechanoreceptors do not appear to provide  
471 a fast feed-forward signal of body rotations that could be used to adjust head orientation  
472 with a very small latency (about 3 – 5 ms in blowflies, Sandeman and Markl, 1980;  
473 Hengstenberg, 1993). Flying wasps never exhibited head compensation in the absence of  
474 image motion at imposed body roll frequencies ranging from 0.2Hz to 2Hz and in response  
475 to step changes in body roll. As in honeybees (Boeddeker and Hemmi, 2010), gaze  
476 stabilization in *Polistes* wasps during enforced thorax roll oscillations thus clearly relies  
477 predominantly on visual feedback, involving motion-sensitive interneurons, which by  
478 necessity introduces much longer latencies than non-visual, open-loop haltere-derived  
479 oculomotor reflexes. In *Polistes* wasps, the largest time delay we found due to phase shift is  
480 about 80 ms, comparable to the 30 ms measured in blowflies (Hengstenberg, 1993). An  
481 alternative possibility is that our maximal turning velocity of 245°/s was too slow to  
482 stimulate potential Coriolis force sensors on the wings. However, halteres in both Diptera  
483 and Strepsiptera do respond to rotational velocities as low as 100°/s (Hengstenberg, 1993;  
484 Pix *et al.*, 1993), so that this is an unlikely reason for why we did not find mechano-sensory  
485 input to the head roll control system in *Polistes*.

486 It remains to be shown, how head roll orientation is controlled in some of the fast flying and  
487 hovering Hymenoptera, such as *Bembix* wasps and *Amegilla* bees. *Bembix* wasps, for  
488 instance, execute fast saccadic sideways translations by extreme body roll movements of up  
489 to 180° amplitude at 2-4000°/s during which the head remains nearly perfectly horizontal  
490 (Zeil *et al.*, 2008). A possibility is that the motion sensitive neurons in these hovering  
491 Hymenoptera are tuned to higher image velocities, as has been shown to be the case in  
492 hoverflies and in bumblebees (O'Carroll *et al.*, 1996). However, our analysis here suggests  
493 that during spontaneous body roll movements, head orientation may be largely controlled  
494 by a feed-forward signal, where a copy of the command signals to the wing motoneurons is  
495 sent with an opposite sign to the head position servo system (for review see Webb, 2004).  
496 In our model, contrary to what has been considered by Varju (1990) and Collett (1980), the

497 efference copy of the control input signal  $U_{\text{roll}}$  does not interfere with the inner and the  
498 outer visual feedback loops, in the sense that it does not cancel the control input signals  
499  $\theta_{\text{headout}}$  and  $\Omega_{\text{headout}}$  to make the head rotate. Our model is also different from the one  
500 proposed by Chan et al. (1998), because it does not rely on inhibition of, or a bias  
501 introduced in, a sensor (the halteres in this case). Unlike suggested by the reafference  
502 (von Holst and Mittelstaedt, 1950), or corollary discharge principle (Sperry, 1950), the  
503 output of our forward model ( $C_f(s)$ ) does not serve as input to a sensory processing unit  
504 (see Webb, 2004 for review), but controls head orientation in such a way that  
505 spontaneous roll body movements do not induce image motion, because the head  
506 remains horizontally aligned. In our model, the control signal  $U_{\text{roll}}$  can be considered as  
507 an input reference for controlling the body's orientation around the roll axis. The wasp  
508 could benefit from a passive roll stability of its body (see video clips of free flight in  
509 supplementary material movies) with a centre of mass placed below the centre of thrust.  
510 The feed-forward control proposed here relies only on an accurate internal model of the  
511 body's dynamics ( $C_f(s)$ ). In the model shown in figure 7E, the control input signal  $U_{\text{roll}}$  is  
512 copied and sent to the feed-forward controller  $C_f(s)$ . The latter improves dramatically the  
513 performance of the gaze stabilization system during spontaneous rotation of the body  
514 because it compensates for the negative phase shift inherent in the two visual feedback  
515 loops. Similar feed-forward control has been suggested to explain the high accuracy of  
516 vertebrate gaze stabilization during self-generated body movements (Combes *et al.*, 2008)  
517 and has been successfully implemented in the gaze stabilization system of a sighted aerial  
518 robot (Kerhuel *et al.*, 2010). We found no delay between head and thorax movements in  
519 freely flying *Polistes* wasps and take this as a strong indication that head roll stabilization  
520 does involve feed-forward control signals that are inherently difficult to detect and to study  
521 in tethered flight. One testable prediction would be that spontaneous changes in wing  
522 movements during tethered flight should trigger brief head movements in the opposite  
523 direction to the intended body roll rotation.

524

525 **Acknowledgements**

526 We thank Waltraud Pix for her help with video film analysis, Mark Snowball for advice and  
527 Franck Ruffier for fruitful discussions. Marc Boyron assisted in designing and producing the  
528 control electronics and the Labview programs. We also thank Julien Dipéri for his help with  
529 the mechanical construction of the setup.

530 **Funding**

531 This work received support from the Australian Research Council Centre of Excellence  
532 program (CE0561903 to JZ) and from the Centre for Visual Sciences at the Australian  
533 National University (to SV). SV acknowledges in addition support from the CNRS, Aix-  
534 Marseille University, the French National Research Agency (ANR with the EVA project and  
535 the IRIS project ANR-12-INSE-0009).

536 **Author contributions**

537 Both authors made equal contributions to conception, design, execution of experiments, to  
538 the interpretation of the findings, to the drafting and the revisions of the article.

539

540

541 **Table 1**

542

| Inter-individual variability | Mean gain error (dB) (N=32) | Mean Std gain error (dB) (N=32) | Mean phase error (degrees) (N=32) | Mean Std phase error (degrees) (N=32) |
|------------------------------|-----------------------------|---------------------------------|-----------------------------------|---------------------------------------|
| Outdoors (3 wasps, 5 trials) | 8.2                         | 2                               | 9                                 | 7.6                                   |
| Indoors (2 wasps, 2 trials)  | 10.5                        | 1.9                             | 14.1                              | 1.6                                   |
| Stripes (3 wasps, 3 trials)  | 12.3                        | 5.2                             | 5.4                               | 4.6                                   |
| Horizon (3 wasps, 3 trials)  | 15.5                        | 4.8                             | 6.2                               | 6.9                                   |

543

544

| Intra-individual variability (3 trials) | Mean gain error (dB) (N=32) | Mean Std gain error (dB) (N=32) | Mean phase error (degrees) (N=32) | Mean Std phase error (degrees) (N=32) |
|-----------------------------------------|-----------------------------|---------------------------------|-----------------------------------|---------------------------------------|
| Wasp 1 - Outdoors                       | 7.6                         | 2                               | 4.9                               | 4.8                                   |
| Wasp 2 - Outdoors                       | 9.2                         | 1.6                             | 15.3                              | 6.2                                   |

545

546

547 **References**

- 548 Berry, R., Stange, G., Olberg, R. and van Kleef, J. (2006). The mapping of visual space by  
549 identified large second-order neurons in the dragonfly median ocellus. *J. Comp. Physiol. A*  
550 192, 1105-1123.
- 551 Berry, R., van Kleef, J. and Stange, G. (2007). The mapping of visual space by dragonfly  
552 lateral ocelli. *J. Comp. Physiol. A* 193, 495-513.
- 553 Boeddeker, N. and Hemmi, J. (2009). Visual gaze control during peering flight manoeuvres in  
554 honeybees. *Proc. Roy. Soc. B* 277, 1209-1217.
- 555 Boeddeker, N., Dittmar, L., Stürzl, W. and Egelhaaf, M. (2010). The fine structure of  
556 honeybee head and body yaw movements in a homing task. *Proc. Roy. Soc. B* 277, 1899-  
557 1906. Chan, W. P., Prete, F. and Dickinson, M. (1998). Visual input to the efferent control  
558 system of a fly's "gyroscope". *Science* 280, 289-292.
- 559  
560 Collett, T. S. (1980). Angular tracking and the optomotor response. An analysis of visual  
561 reflex Interaction in a hoverfly. *J. Comp. Physiol.* 140, 145-158.
- 562 Combes, D., Le Ray, D., Lambert, F., Simmers, J. and Straka, H. (2008). An intrinsic feed-  
563 forward mechanism for vertebrate gaze stabilization. *Curr. Biol.* 18, R241-R243.
- 564 Dickinson, M.H. (1999). Haltere-mediated equilibrium reflexes of the fruitfly, *Drosophila*  
565 *melanogaster*. *Phil. Trans. R. Soc. Lond. B* 354, 903–916.
- 566 Egelhaaf, M., Grewe, J., Kern, R. and Warzecha, A.K. (2001). Outdoor performance of a  
567 motion-sensitive neuron in the blowfly. *Vision Res.* 27, 3627-3637.
- 568 Fox, J.L. and Daniel, T.L. (2008). A neural basis for gyroscopic force measurement in the  
569 halteres of *Holorusia*. *J. Comp. Physiol.* A194, 887-897.
- 570 Frye, M.A. (2009). Neurobiology: Fly gyro-vision. *Curr. Biol.* 19, R1119-R1120.
- 571 Gilbert, C. and Bauer, E. (1998). Resistance reflex that maintains upright head posture in the  
572 flesh fly *Neobellieria bullata* (Sarcophagidae). *J. Exp. Biol.* 201, 2735–2744.

- 573 Hengstenberg, R. (1988). Mechanosensory control of compensatory head roll during flight in  
574 the blowfly *Calliphora erythrocephala* Meig. *J. Comp. Physiol. A* 163, 151-165.
- 575 Hengstenberg, R. (1993). Multisensory control in insect oculomotor systems. In *Visual*  
576 *Motion and its Role in the Stabilization of Gaze* (ed. F. A. Miles and J. Wallmann), pp. 285–  
577 298. Amsterdam, London: Elsevier.
- 578 Huston, S. J. and Krapp, H. G. (2009) Nonlinear integration of visual and haltere inputs in fly  
579 neck motor neurons. *J Neurosci*, 29, 13097-13105
- 580 Juusola, M. and Hardie, R.C. (2001a). Light adaptation in *Drosophila* photoreceptors: I.  
581 Response dynamics and signaling efficiency at 25°C. *J. Gen. Physiol.* 117, 3-25.
- 582 Juusola, M. and Hardie, R.C. (2001b). Light adaptation in *Drosophila* photoreceptors: II.  
583 Rising temperature increases the bandwidth of reliable signaling. *J. Gen. Physiol.* 117, 27-  
584 41.
- 585 Kerhuel, L., Viollet, S. and Franceschini, N. (2010) Steering by Gazing: An Efficient Biomimetic  
586 Control Strategy for Visually-guided Micro-Air Vehicles. *IEEE Trans. on Robotics* 26, 307-319.
- 587 Krapp, H. G., Hengstenberg, B., and Hengstenberg, R. (1998). Dendritic structure and  
588 receptive-field organization of optic flow processing interneurons in the fly. *J. Neurophysiol*,  
589 79, 1902-1917.
- 590 Laughlin, S.B. and Weckström, M. (1993). Fast and slow photoreceptors – a comparative  
591 study of the functional diversity of coding and conductances in the diptera. *J. Comp. Physiol.*  
592 *A* 172, 593–609.
- 593 Lewen, G. D. and de Ruyter van Steveninck, B. W. (2001) Neural coding of naturalistic  
594 motion stimuli. *Network* 12, 317–329.
- 595 Ljung, L. (1996), *System identification. The control Handbook* (W. S. Levine ed.), CRC Press,  
596 1033-1054.
- 597 Ljung, L. (1999). *System Identification - Theory for the user*. PTR Prentice Hall, Upper Saddle  
598 River, New Jersey.

- 599 Nalbach, G. (1993). The halteres of the blowfly *Calliphora*. I. Kinematics and dynamics. J.  
600 Comp. Physiol. A 173, 293–300.
- 601 Nalbach, G. (1994). Extremely non-orthogonal axes in a sense organ for rotation:  
602 behavioural analysis of the dipteran haltere system. Neuroscience 61, 149 –163.
- 603 Nalbach, G. and Hengstenberg, R. (1994). The halteres of the blowfly *Calliphora*. II. 3-  
604 Dimensional organization of compensatory reactions to real and simulated rotations. J.  
605 Comp. Physiol. A 175, 695–708.
- 606 O’Carroll, D.C., Bidwell, N.J., Laughlin, S.B. and Warrant, E.J. (1996). Insect motion detectors  
607 matched to visual ecology. Nature 382, 63-66.
- 608 Parsons, M. M., Krapp, H. G. and Laughlin, S. B., (2010), Sensor fusion in identified visual  
609 interneurons. Curr. Biol. 20, 624-628.
- 610 Paulk, A., and Gilbert, C. (2006) Proprioceptive encoding of head position in the black soldier  
611 fly, *Hermetia illucens* (L.) (Stratiomyidae). J. Exp. Biol. 209, 3913-3924.
- 612 Pix, W., Nalbach, G. and Zeil, J. (1993). Strepsipteran forewings are haltere-like organs of  
613 equilibrium. Naturwissenschaften 80, 371-374.
- 614 Preuss, T. and Hengstenberg, R. (1992). Structure and kinematics of the prosternal organs  
615 and their influence on head position in the blowfly *Calliphora erythrocephala* Meig. J. Comp.  
616 Physiol. A 171, 483-493.
- 617 Sandeman, D.C. and Markl, H. (1980). Head movements in flies (*Calliphora*) produced by  
618 deflection of the halteres. J. Exp. Biol. 85, 43-60.
- 619 Sane, S. P., Dieudonné, A., Willis, M. A. and Daniel, T. L. (2007) Antennal mechanosensors  
620 mediate flight control in moths. Science 315, 863-866.
- 621 Schilstra, C., and van Hateren, J.H. (1999a). Blowfly flight and optic flow. I. Thorax kinematics  
622 and flight dynamics. J. Exp Biol. 202, 1481-1490.
- 623 Schilstra, C., and van Hateren, J.H. (1999b). Blowfly flight and optic flow. II. Head  
624 movements during flight. J. Exp Biol. 202, 1491-1500.



- 625 Sherman, A. and Dickinson, M. H. (2003). A comparison of visual and haltere-mediated  
626 equilibrium reflexes in the fruit fly *Drosophila melanogaster*. .J Exp Biol. 206, 295-302.
- 627 Schuppe, H. and Hengstenberg, R. (1993). Optical properties of the ocelli of *Calliphora*  
628 *erythrocephala* and their role in the dorsal light response. J. Comp. Physiol. A 173, 143-149.
- 629 Schwyn, D.A., Heras, F.J.H., Bolliger, G., Parsons, M.M., Krapp, H.G. and Tanaka, R.J. (2011).  
630 Interplay between feedback and feedforward control in fly gaze stabilization. Proc. IFAC  
631 World Congress, Milano, Italy, 9674-9679.
- 632 Simmons, P.J. (2011). The effects of temperature on signalling in ocellar neurons of the  
633 desert locust, *Schistocerca gregaria*. J. Comp. Physiol. A 197, 1083-1096.
- 634 Sperry, R.W. (1950). Neural basis of the spontaneous optokinetic response produced by  
635 visual inversion. J. Comp. Physiol. Psychol. 43, 482 – 489.
- 636 Stange, G. (1981). The ocellar component of flight equilibrium control in dragonflies. J.  
637 Comp. Physiol. 141, 335-347.
- 638 Tatler, B., O'Carroll, D.C. and Laughlin, S.B. (2000). Temperature and the temporal resolving  
639 power of fly photoreceptors. J. Comp. Physiol. A 186, 399-407.
- 640 Taylor, G.K. and Krapp, H.G. (2007). Sensory systems and flight stability: What do insects  
641 measure and why? Adv. Insect Physiol. 34, 231–316.
- 642 Varju, D. (1990). A note on the reafference principle. Biol. Cybern. 63, 315-323.
- 643 von Holst, E. and Mittelstaedt, H. (1950). Das Reafferenzprinzip. Naturwissenschaften 37,  
644 464–476.
- 645 Webb, B. (2004). Neural mechanisms for prediction: do insects have forward models?  
646 Trends in Neurosci. 27, 278-282.
- 647 Xia, X. G. (1997). System identification using chirp signals and time-variant filters in the joint  
648 time-frequency domain. IEEE Trans. on Signal Processing 45, 2072-2084.
- 649 Zeil, J., Boeddeker, N. and Hemmi, J.M. (2008). Vision and the organization of behaviour.  
650 Curr. Biol. 18, R320-R323.



## 652 Figure Legends

653 Fig. 1 Experimental setup to determine compensatory head roll movements in *Polistes*  
654 wasps. (A) Wasps were tethered by waxing a strip of cardboard to their thorax and mounted  
655 onto the shaft of a servo motor which was used to rotate the wasps' body. Wasps viewed  
656 different visual scenes (B): a natural, outdoor environment (B1), a cluttered and artificially lit  
657 indoor laboratory environment (B2), a regular pattern of black and white stripes inside an  
658 opaque tube (B3), an artificial horizon (B4), a homogeneous white background (B5), or a  
659 completely dark environment (B6). Patterns inside an opaque horizontal cylindrical drum  
660 were illuminated with a fibre-optics ring-light and three pairs of infrared LEDs (in case of  
661 B6). Wasps were filmed head-on with a digital video camera at 50 or 120fps. (C) Sample  
662 images of head and body orientation in the two visual conditions outdoors and with a  
663 uniform white pattern. The points on the head and the holding structure that were used to  
664 determine orientation are marked by red dots. Note the lack of head roll compensation in  
665 the uniform condition. (D) The velocity profile of the chirp signal applied to the servo motor  
666 (see Methods for details). (E) Three snapshots from video records of male *Polistes* in free  
667 flight. The head and the tip of the abdomen are marked by red and yellow dots,  
668 respectively. Their horizontal distance ( $x$ ), together with independent measurements of the  
669 length of the wasps' body long axis ( $l$ ) was used to estimate the yaw axis orientation ( $\phi$ ) of  
670 wasps (see schematic on the right). The points used to determine head orientation and body  
671 roll orientation are marked with blue dots.

672 Fig. 2 Time course of head roll responses to sinusoidal, frequency modulated (chirp)  
673 oscillations applied to the body. In each of the four visual conditions indicated by  
674 pictograms (see Fig. 1B for explanation), the mean and standard deviation (coloured  
675 envelope) of body orientation (blue), of head orientation (red) and of head orientation  
676 relative to the body (black and green) were plotted. The chirp signal frequency increased  
677 from 0.2Hz to 2Hz in 20s. Number of wasps and number of chirp runs averaged are given for  
678 each panel.

679 Fig. 3 Dynamic properties of the head roll response. (A) The mean chirp responses of the  
680 head in the four visual conditions: outdoors, room light, B/W stripes and horizon. (B) Bode  
681 diagram for the gain computed from the time-course of responses shown in (A). Thick lines

682 are means and coloured areas are means  $\pm$  standard deviation. Dotted line indicates perfect  
 683 compensation of the head at 0 dB. (C) Bode diagram for the phase (perfect compensation at  
 684  $-180^\circ$  indicated by dotted line). Otherwise conventions as in (B). Bode diagrams for the gain  
 685 (D) and phase (E) for three stimulus repetitions outdoors obtained for one wasp.

686 Fig. 4 Head roll responses in a uniform bright environment and in the dark. (A) Time course  
 687 of head roll responses to sinusoidal, frequency modulated (chirp) oscillations applied to the  
 688 body. Conventions as in Fig. 2. (B) Autocorrelation of body oscillations (blue) and cross-  
 689 correlation of body oscillation against the negative values of head movements relative to  
 690 the body (red dotted line), for the ideal case:  $\theta_{\text{body}}(t) = -\theta_{\text{headbody}}(t)$ . The quality of  
 691 compensation is indicated by a high correlation coefficient with some delay. Number of  
 692 wasps and number of responses as in Fig. 2 for conditions horizon, stripes, indoor and  
 693 outdoor. Uniform: Responses obtained from 3 wasps ( $N = 3$ ) and 3 chirps in total ( $n=3$ ).  
 694 Dark: Responses obtained from 2 wasps ( $N = 2$ ) and 2 chirps in total ( $n=2$ )

695 Fig. 5 Head roll responses of three wasps (top to bottom row) to step body rotations  
 696 outdoors (left column), in a cylinder with black and white stripes (centre column) and in the  
 697 dark (right column). Blue: body orientation; Black: head orientation; Red: head orientation  
 698 relative to body.

699 Fig. 6 Modelling head roll stabilization. (A) Left: Block diagram of the head stabilization  
 700 system in *Polistes* wasps based on two nested visual feedback-loops. Right: Transfer  
 701 functions of the block diagram described on the left for model responses shown in (B) with  
 702  $s$ : Laplace variable. The inner feedback-loop receives input on head angular speed  
 703 ( $\Omega_{\text{head\_out}}$ ) measured by motion sensitive neurons ( $H_{\text{MS}}(s)$ ) while the input to the outer  
 704 feedback loop is the head orientation ( $\theta_{\text{head\_out}}$ ) that could be measured by the tonic dorsal  
 705 light response mediated by the compound eyes. The visual regulator  $C_v(s)$  is a simple first  
 706 order low pass filter removing the high frequency components amplified by the derivative  
 707 action of  $H_{\text{MS}}(s)$ . The head dynamics are modelled by a first order low pass filter with a time  
 708 constant of 5ms compatible with the low inertia and mass of the head. (B) Model  
 709 performance compared to wasp step responses in outdoor and in black and white stripe  
 710 conditions. Model responses  $\theta_{\text{head}}(t)$  (thick grey lines) and  $\theta_{\text{headbody}}(t)$  (thick red lines) were

711 computed by taking measured body orientation  $\theta_{\text{body}}(t)$  (blue lines) as input disturbance for  
 712 the two nested visual feedback-loops. Otherwise conventions as in Fig. 5.

713 Fig. 7 Head roll control in free flight. (A) Time course of body orientation relative to vertical  
 714 (blue), head orientation relative to horizontal (red), the inverse of head orientation relative  
 715 to the body (black) and the yaw orientation of the body longitudinal axis (green) of  
 716 patrolling *Polistes* males for four example sequences recorded at 300fps. The sequence in  
 717 the top panel has been digitized 5 times, with means (thick lines) and standard deviations  
 718 (shaded areas) shown in equivalent colours. Inset numbers are mean standard deviations  
 719 for the four variables. The horizontal grey areas in all panels mark  $\pm 10^\circ$ . (B) Left: histograms  
 720 of head orientation relative to horizontal (red) and body orientation relative to vertical  
 721 (blue); Right: histograms of angular velocity of head (red) and body (blue). Data from 13  
 722 sequences, where wasp yaw orientation was within  $\pm 10^\circ$  parallel to the optical axis of the  
 723 camera; 3.75 s total flight time. (C) Mean cross-correlation functions (black dotted lines)  
 724 with standard deviation (grey shaded areas) for the same data set as used in (B). Left: head  
 725 orientation relative to the body ( $\theta_{\text{head body}}$ ) against body orientation ( $\theta_{\text{body}}$ ). Right: head  
 726 angular velocity relative to the body ( $\frac{\partial \theta_{\text{head body}}}{\partial t}$ ) against body angular velocity ( $\frac{\partial \theta_{\text{head}}}{\partial t}$ ). (D)  
 727 Expanded block diagram of the proposed head stabilization system in *Polistes* wasps  
 728 including a feed-forward controller  $C_f(s)$  that leads in principle to an exact compensation of  
 729 head orientation ( $\theta_{\text{headbody}}$ ) during spontaneous rotations of the body ( $\theta_{\text{body}}$ ). The common  
 730 drive signal  $U_{\text{roll}}$  controls both head and body roll orientation, while the two nested visual  
 731 feedback-loops (see Fig. 6A) provide an absolute orientation reference and correct any  
 732 remaining slip speed (for details see text). Without any recording of the signal  $U_{\text{roll}}$ , model  
 733 responses  $\theta_{\text{head}}(t)$  (thick grey lines) and  $\theta_{\text{headbody}}(t)$  (thick red lines) plotted in (A) were  
 734 computed by taking measured body orientation  $\theta_{\text{body}}(t)$  (blue lines) as input signal for  $C_f(s)$   
 735 and as input disturbance for the two nested visual feedback-loops.

736

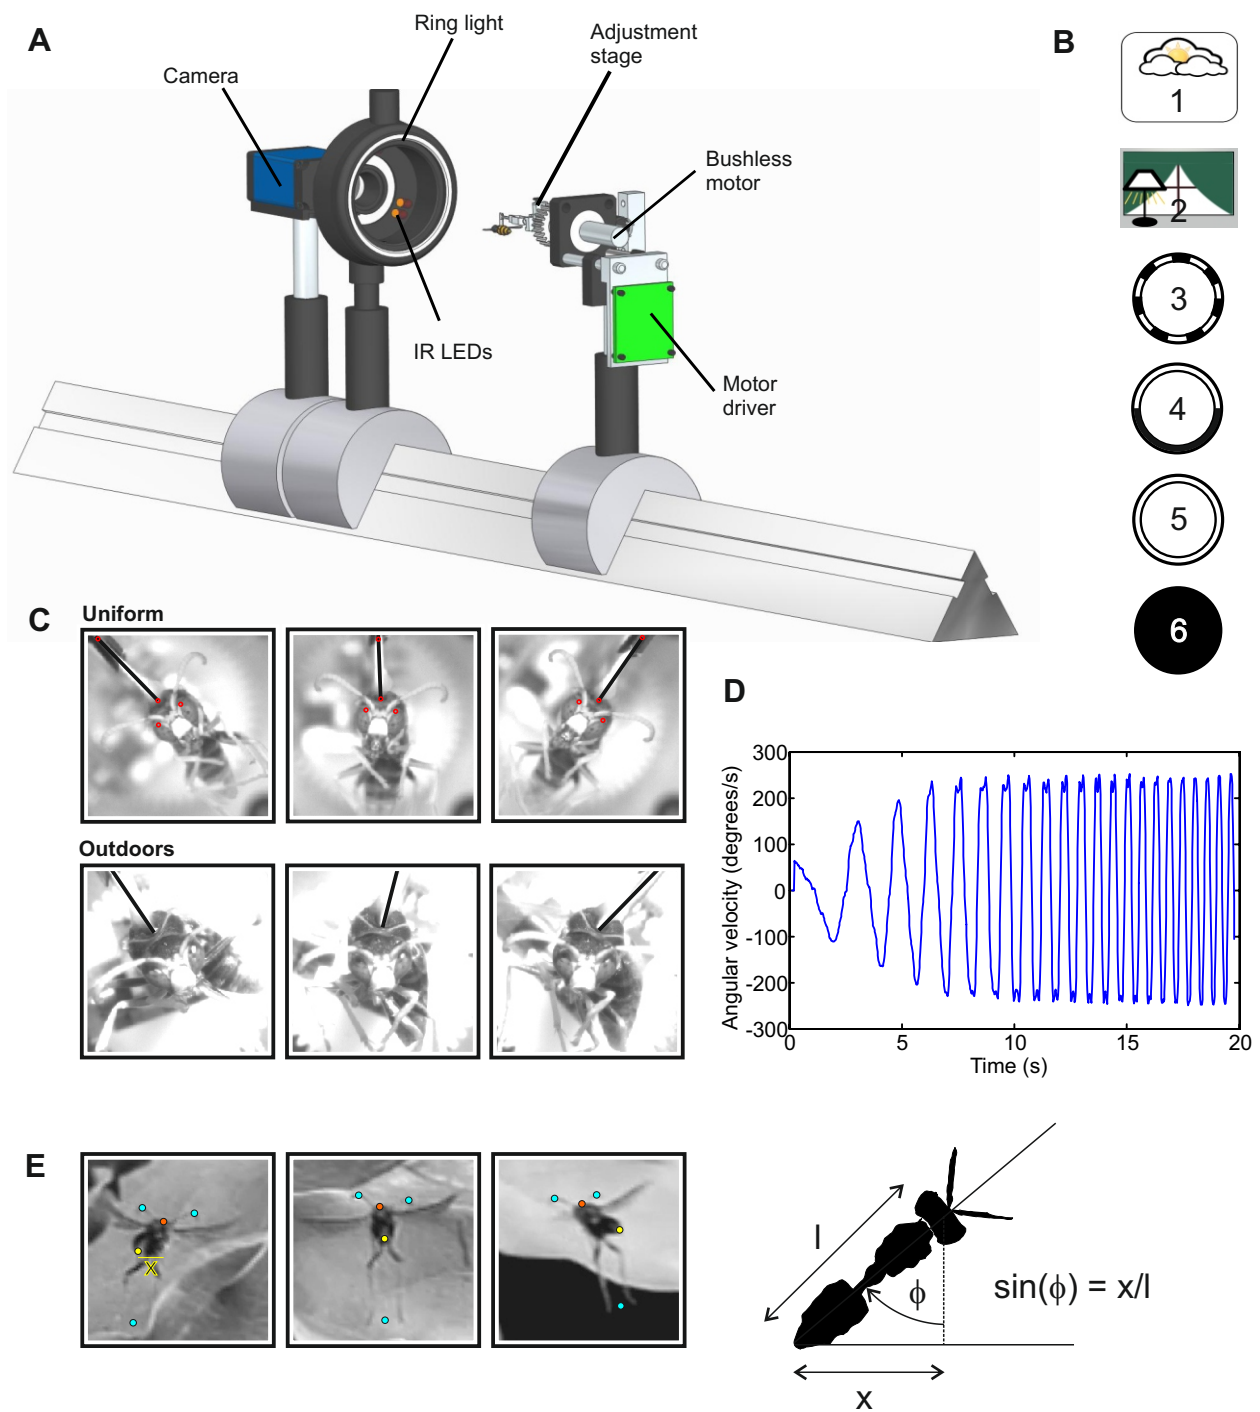

Fig. 1  
Viollet & Zeil

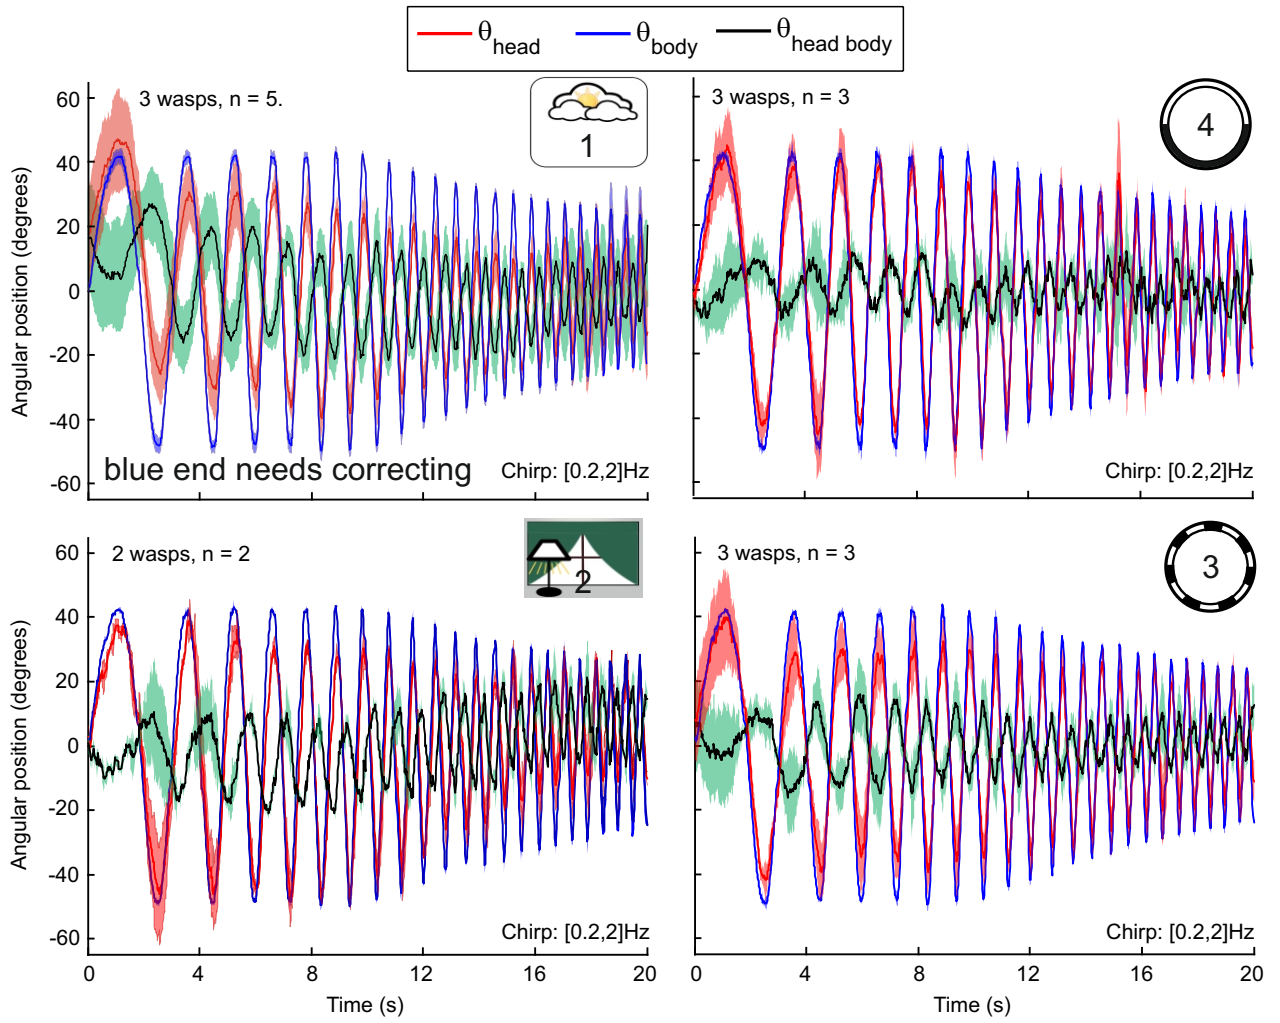

Fig. 2  
Viollet & Zeil

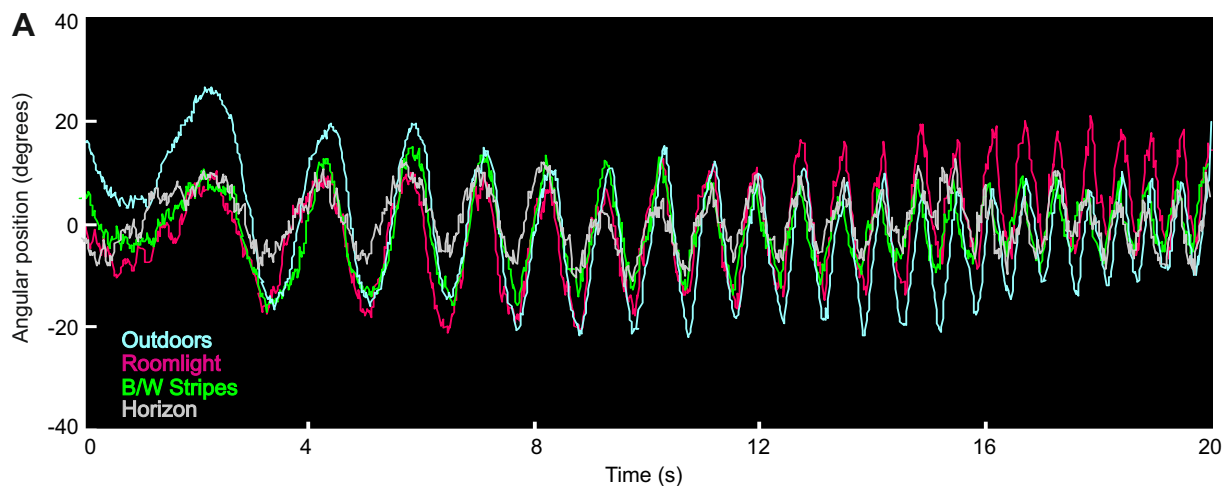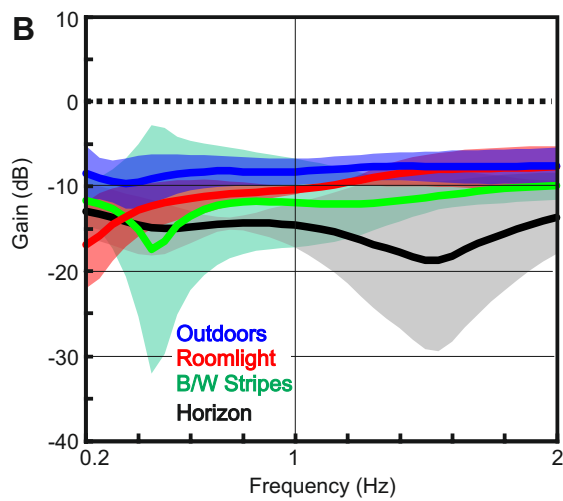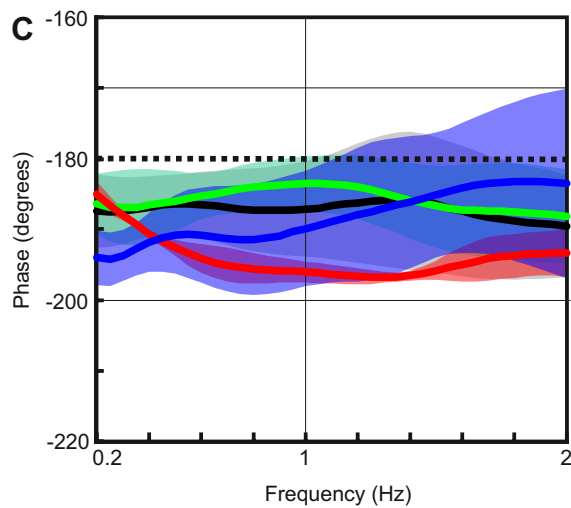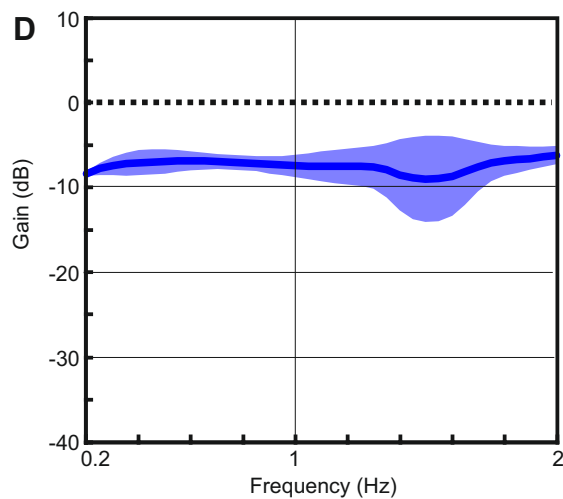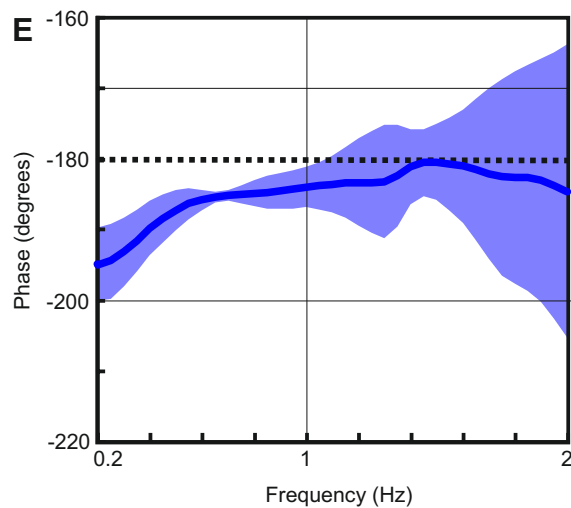

Fig. 3  
Viollet & Zeil



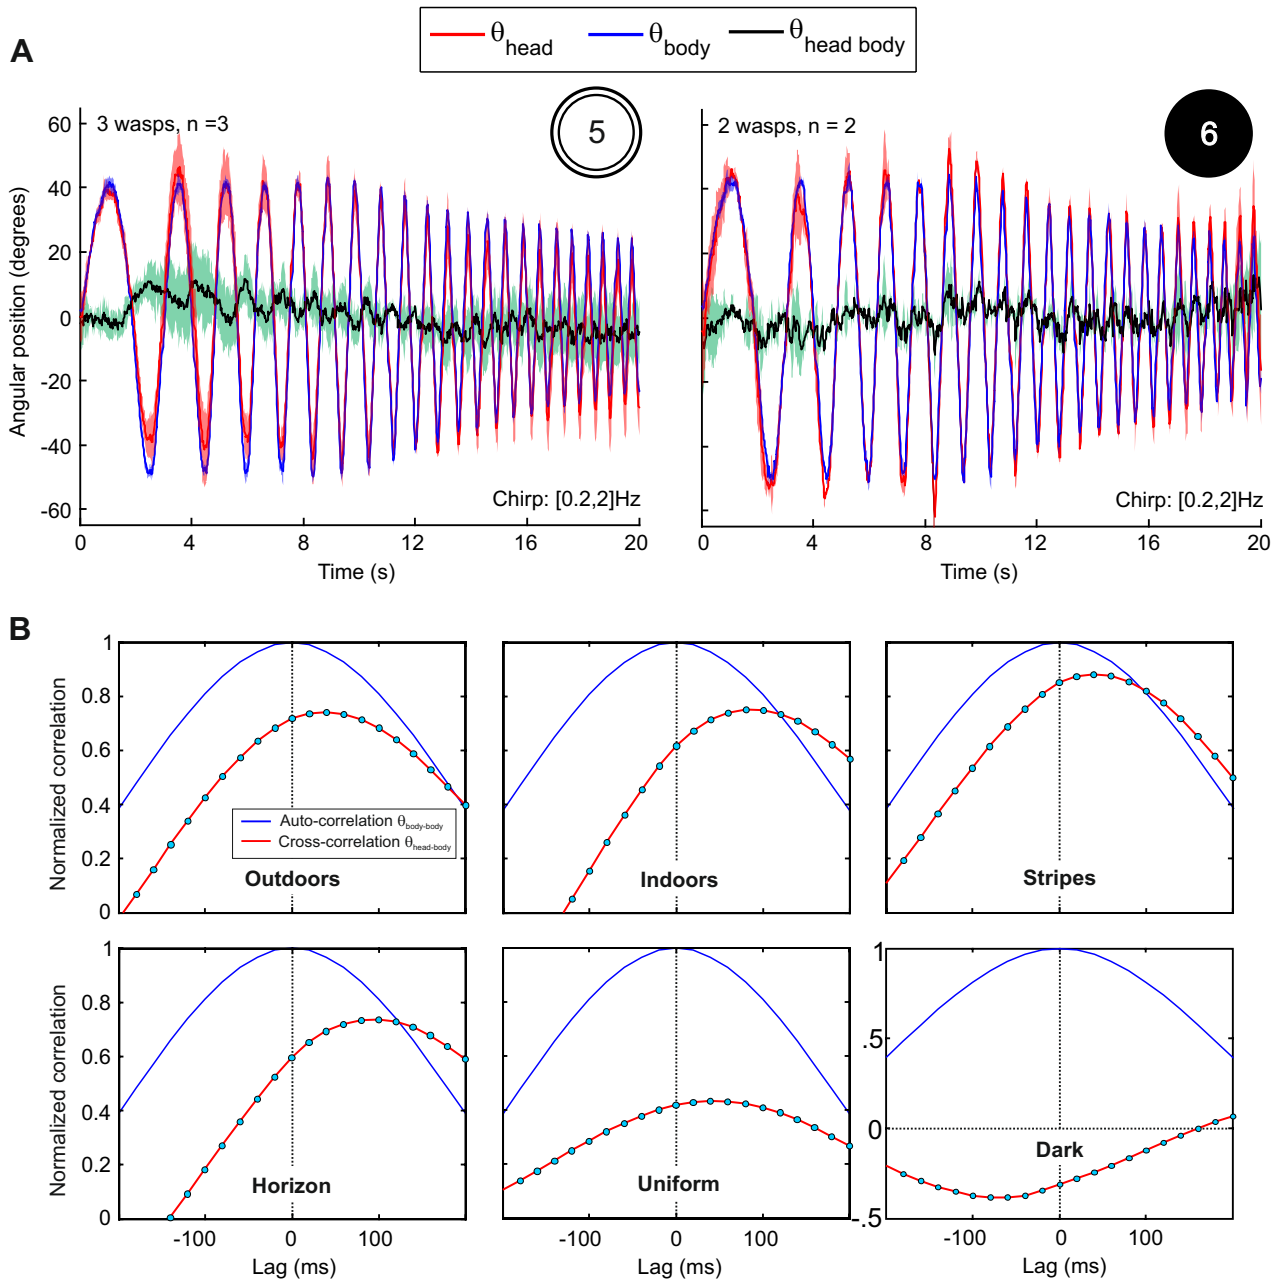

Fig. 4  
Viollet & Zeil

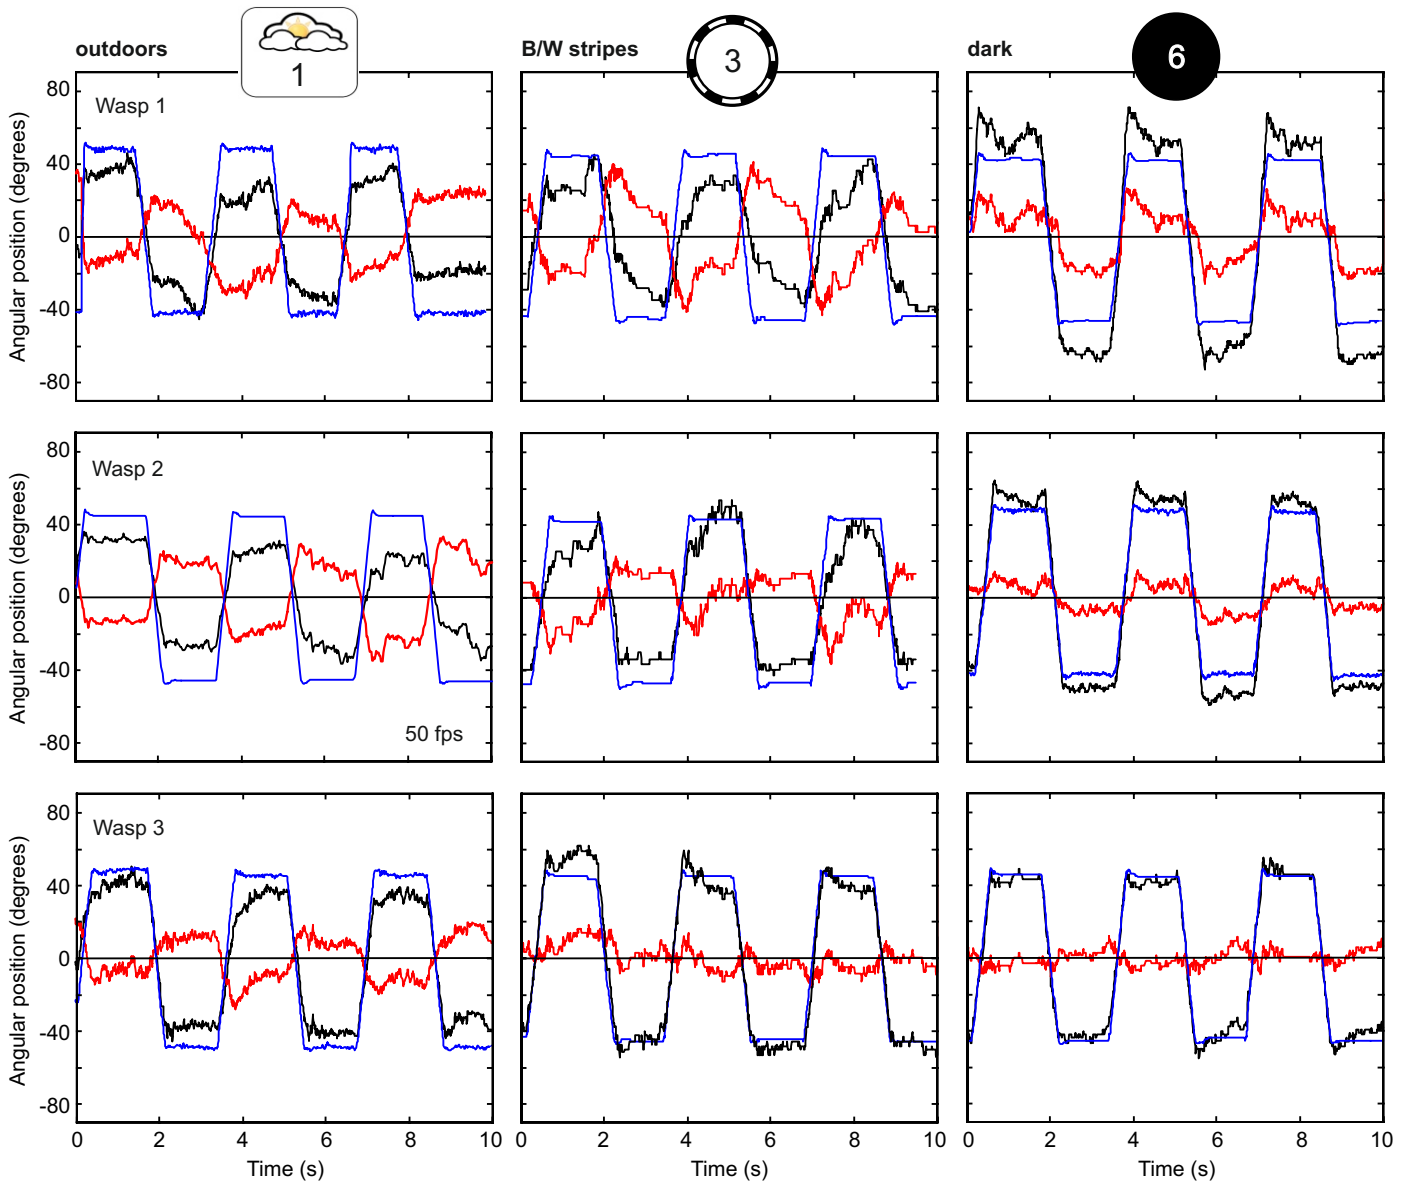

Fig. 5  
Viollet & Zeil

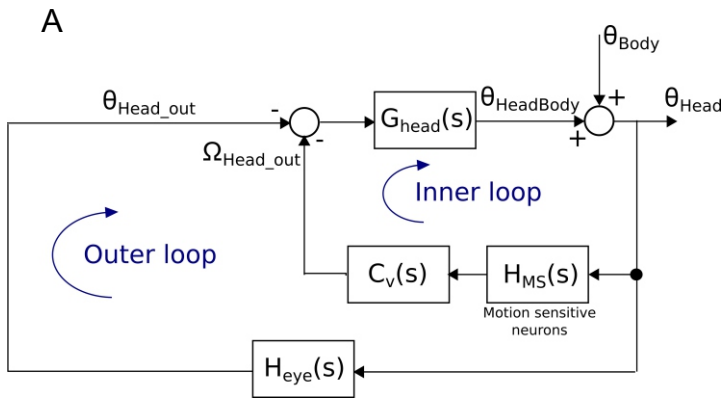

|                   | $H_{MS}(s)$               | $H_{eye}(s)$            | $C_v(s)$             | $G_{head}(s)$          |
|-------------------|---------------------------|-------------------------|----------------------|------------------------|
| Wasp1<br>Outdoors | $\frac{0.05s}{(1+0.02s)}$ | $\frac{0.25}{(1+0.5s)}$ | $\frac{5}{(1+0.5s)}$ | $\frac{1}{(1+0.005s)}$ |
| Wasp1<br>Stripes  | $\frac{0.1s}{(1+0.02s)}$  | 0 (openloop)            | $\frac{5}{(1+0.5s)}$ | $\frac{1}{(1+0.005s)}$ |
| Wasp2<br>Outdoors | $\frac{0.05s}{(1+0.02s)}$ | $\frac{0.5}{(1+0.5s)}$  | $\frac{8}{(1+0.5s)}$ | $\frac{1}{(1+0.005s)}$ |
| Wasp3<br>Outdoors | $\frac{0.04s}{(1+0.02s)}$ | $\frac{0.27}{(1+0.5s)}$ | $\frac{5}{(1+0.5s)}$ | $\frac{1}{(1+0.005s)}$ |

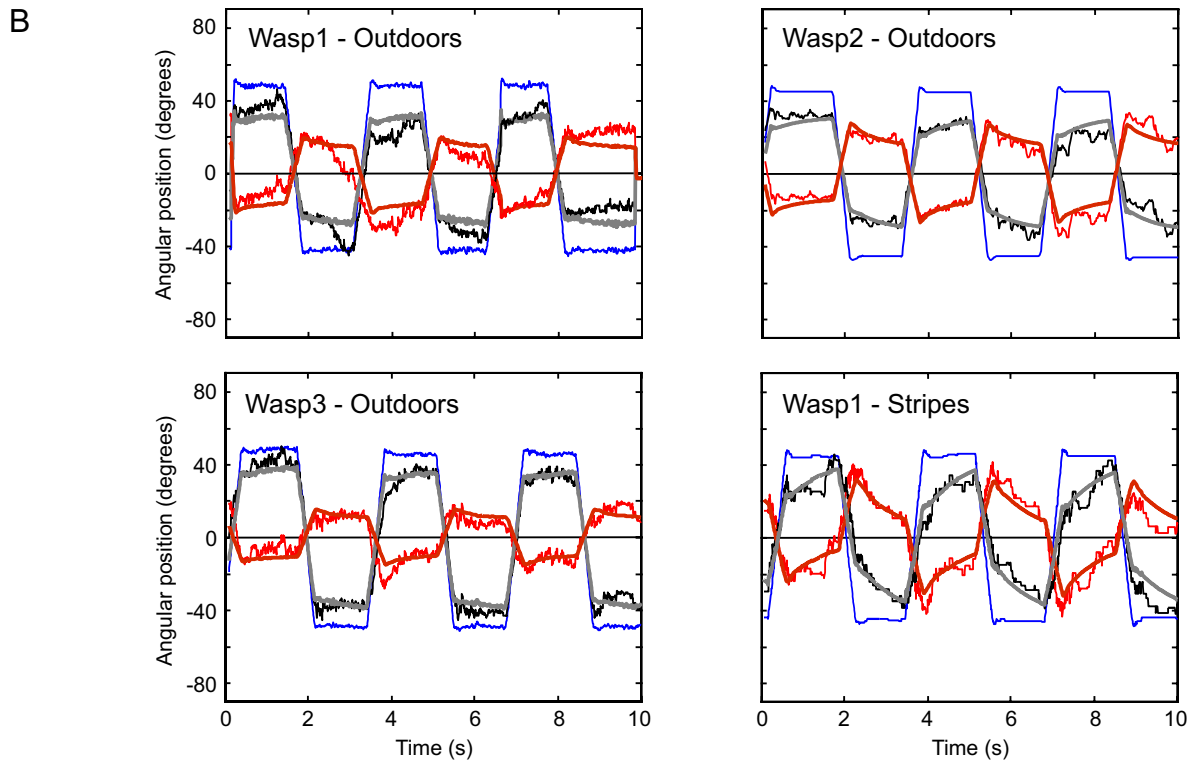

**Fig. 6**  
Viollet & Zeil

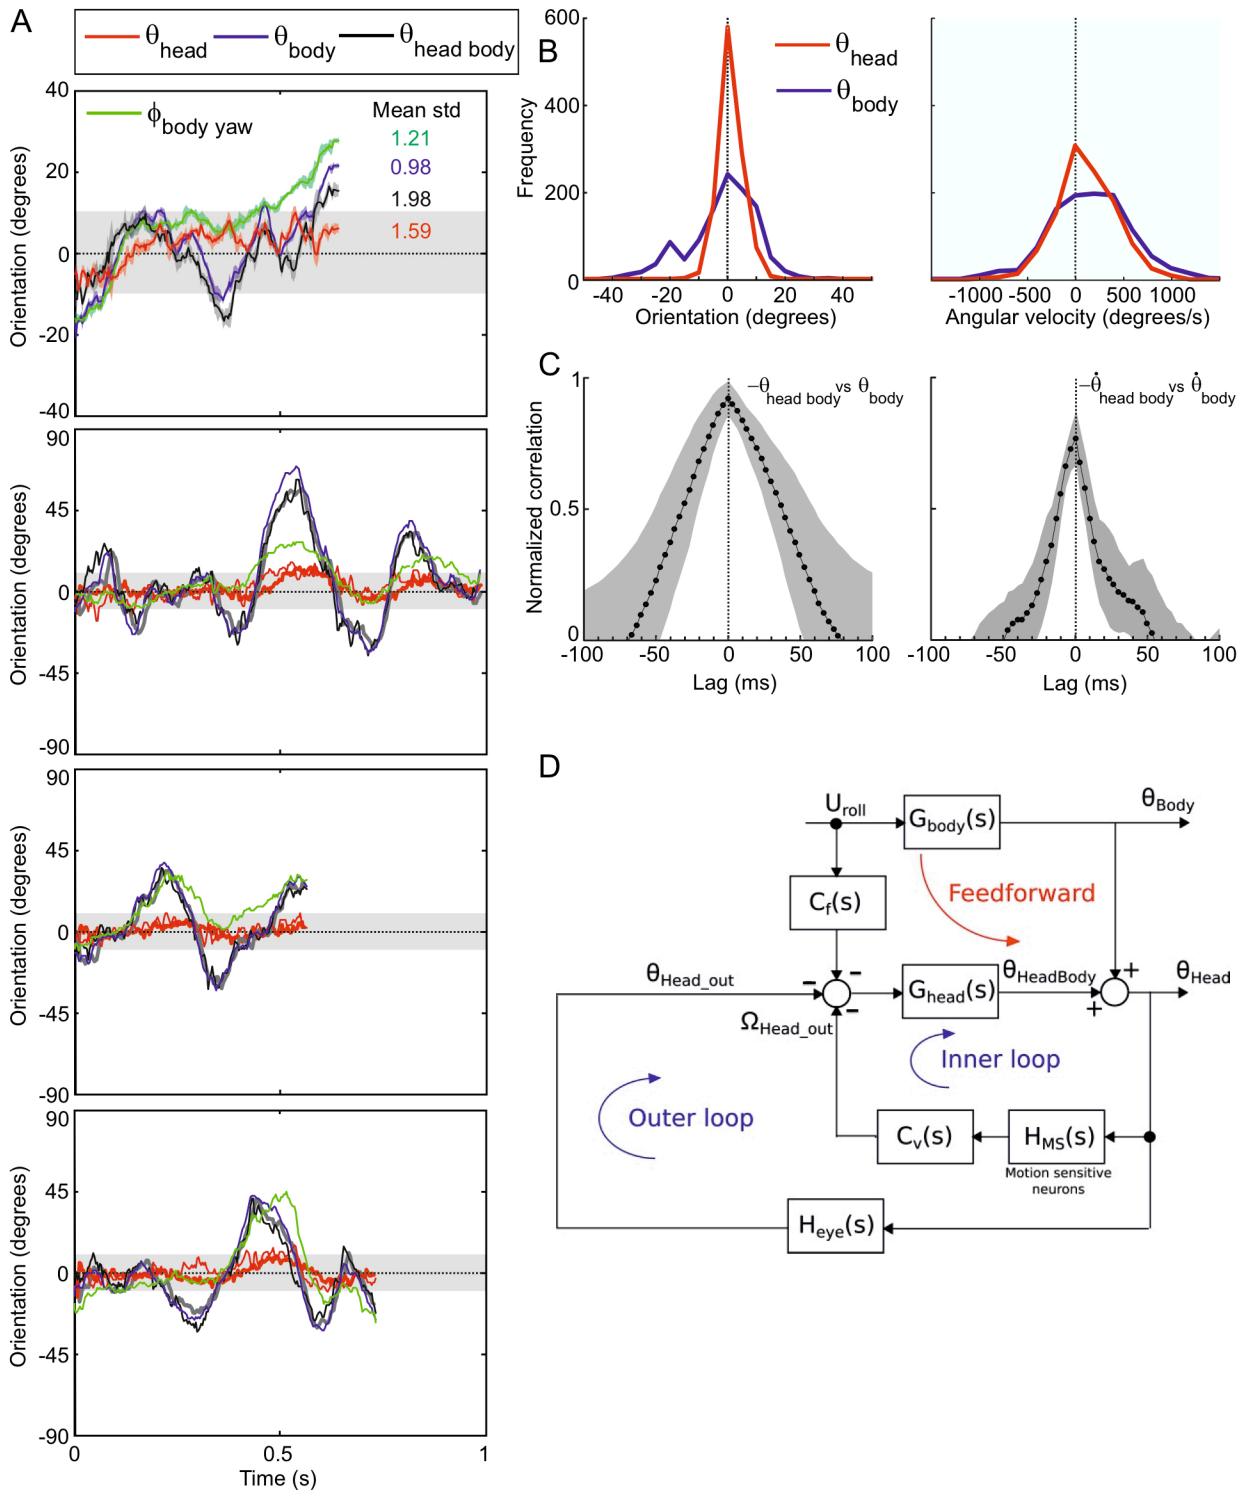

Fig. 7  
Viollet & Zeil
